# Supplementary material for: Cordycepin (3′-Deoxyadenosine) Suppresses Heat Shock Protein 90 Function and Targets Tumor Growth in an Adenosine Deaminase-Dependent Manner
Source: MDPI journal article supplement (doi:10.3390/cancers14133122), 2022-06-25

Figure 1.

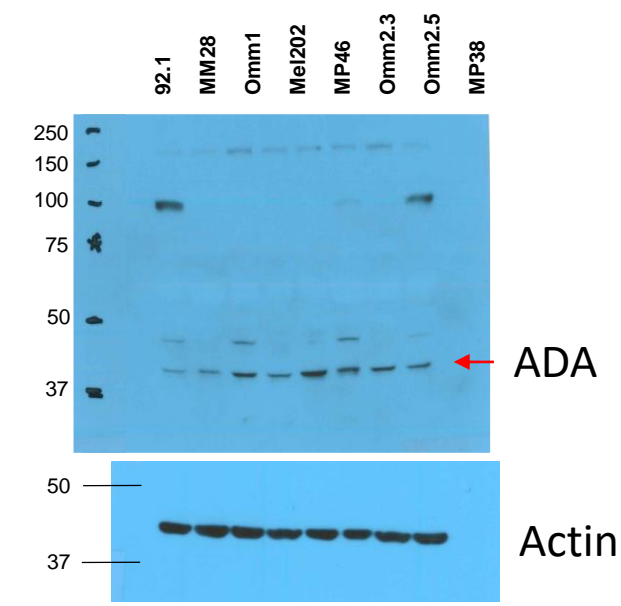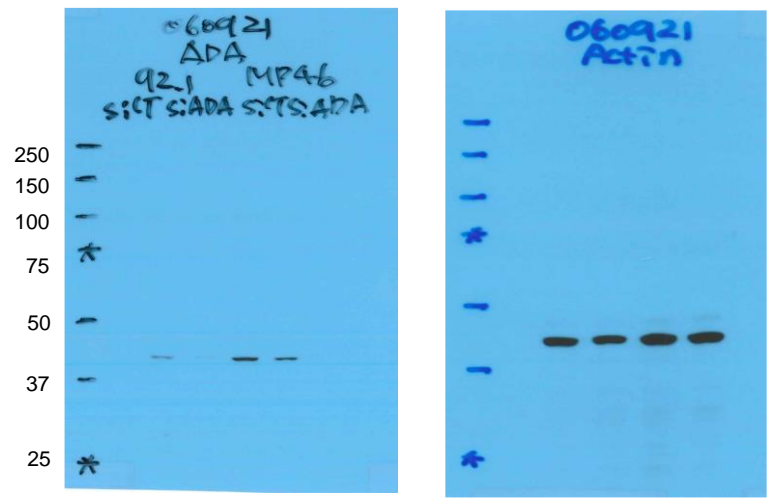

Figure 4.

Cl. Parp

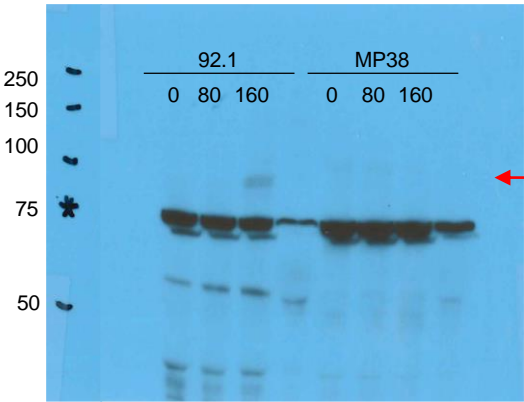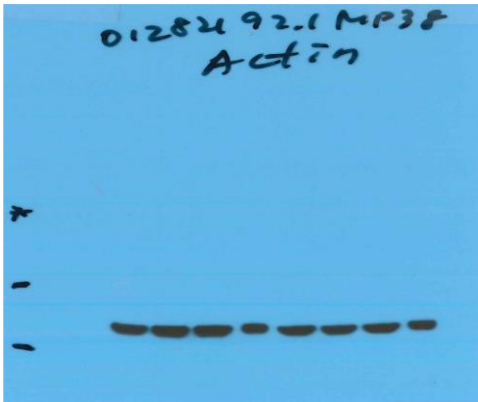

Cl. Parp

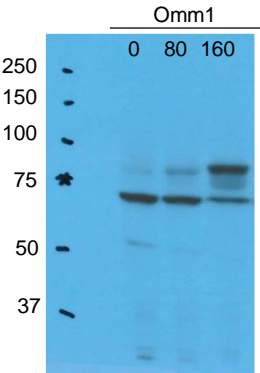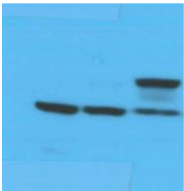

Actin

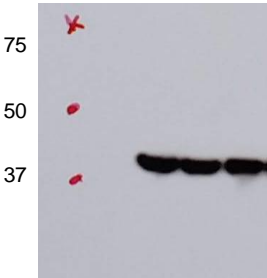

Figure 4.

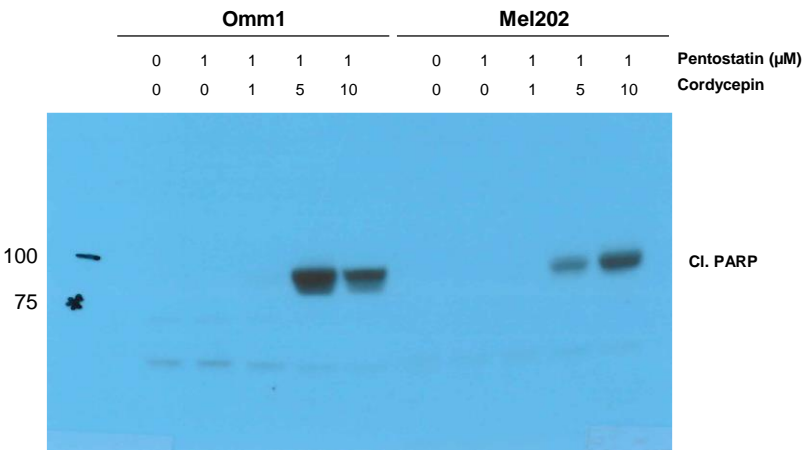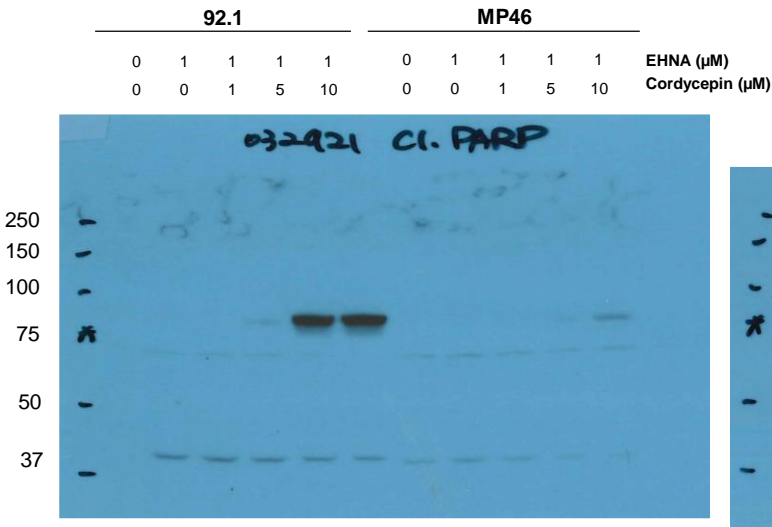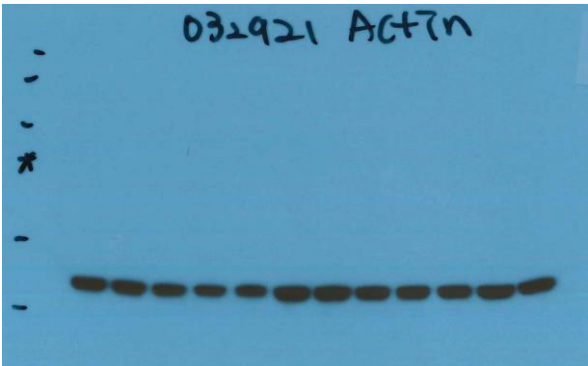

Figure 5.

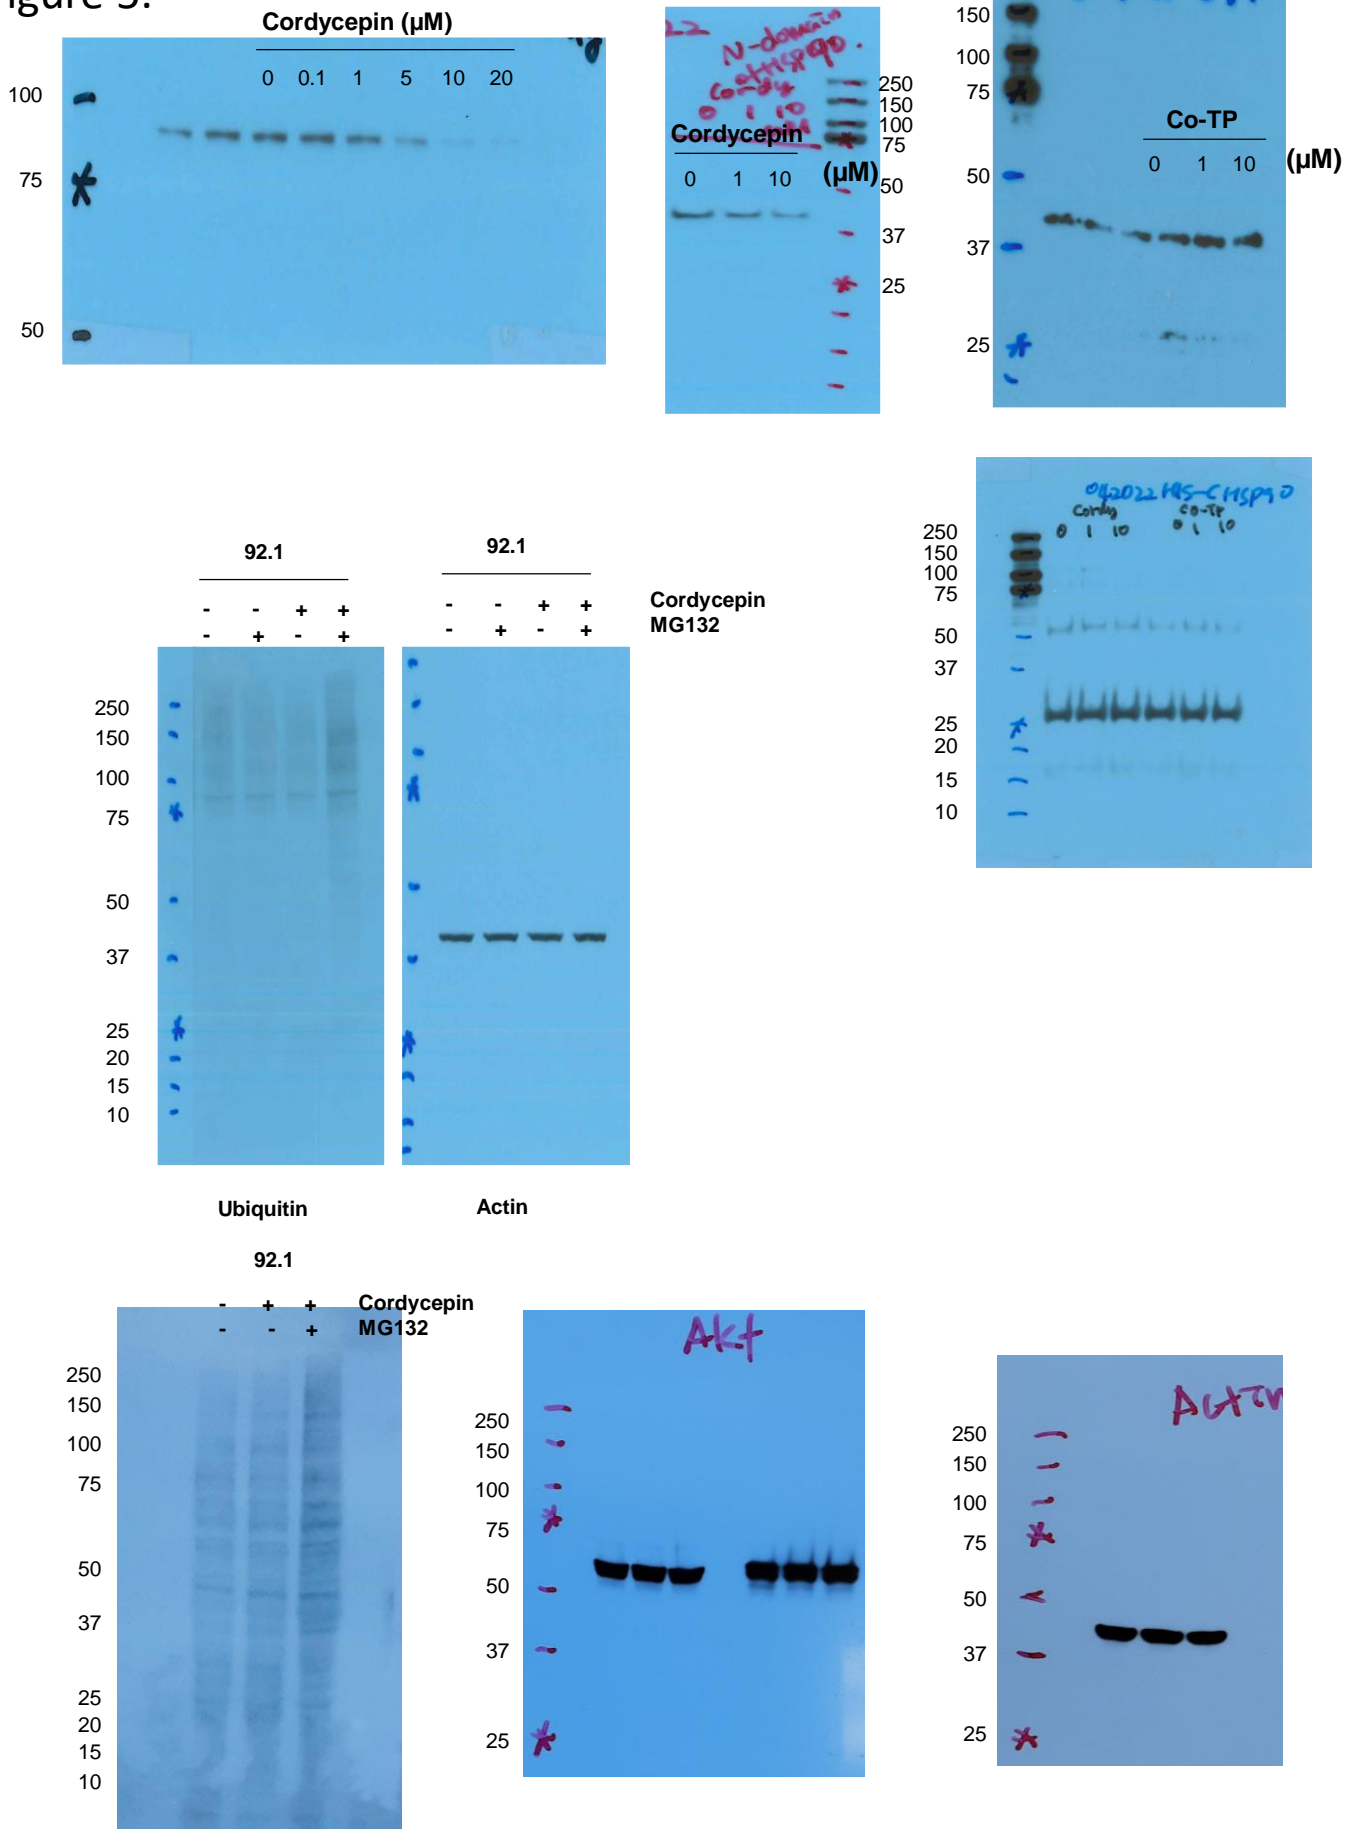

Figure 5.

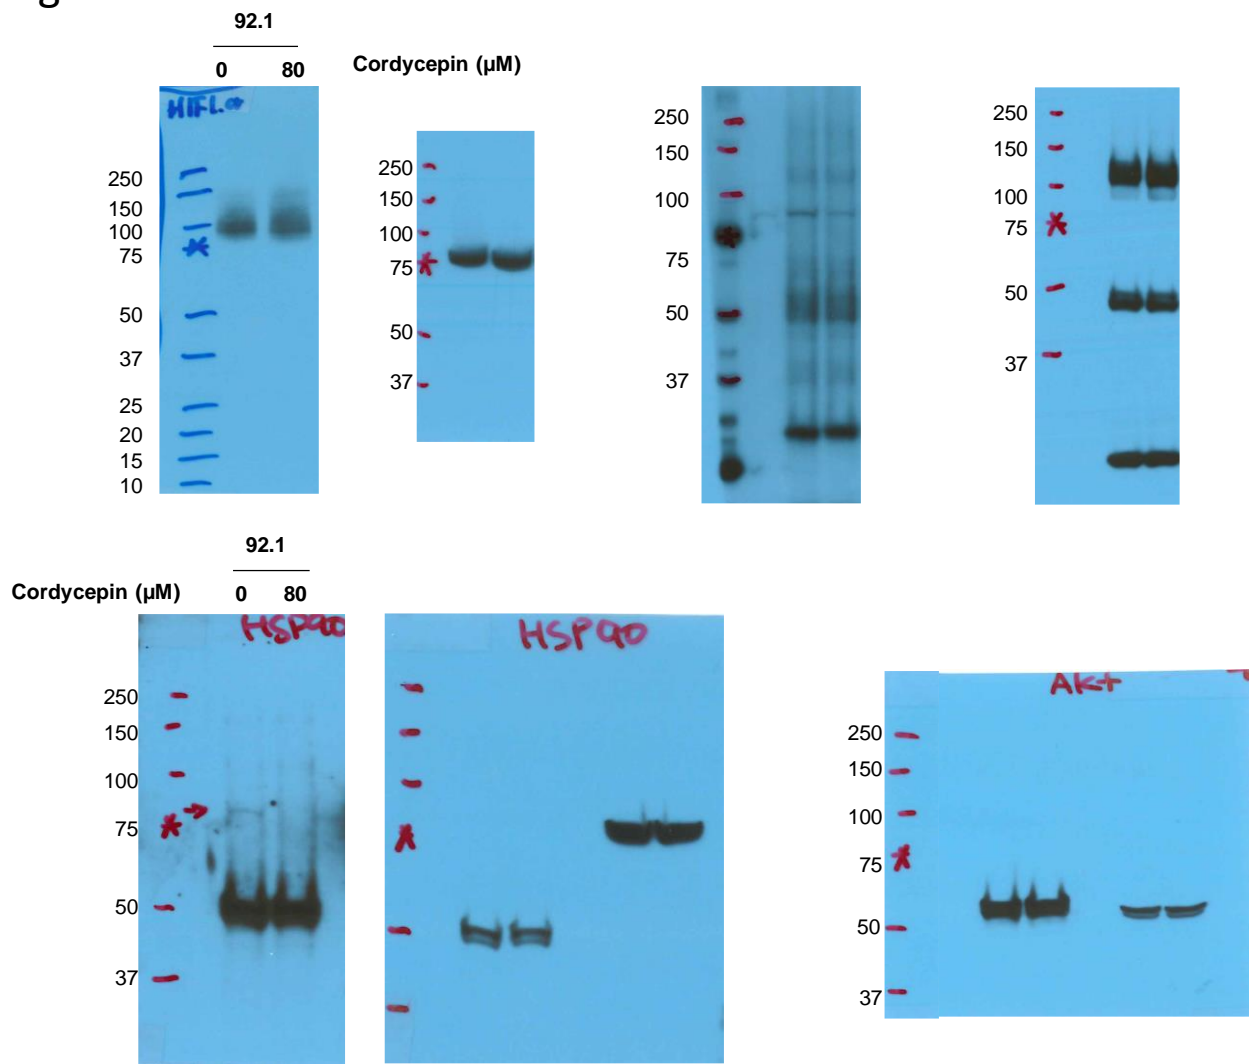

Figure 5.

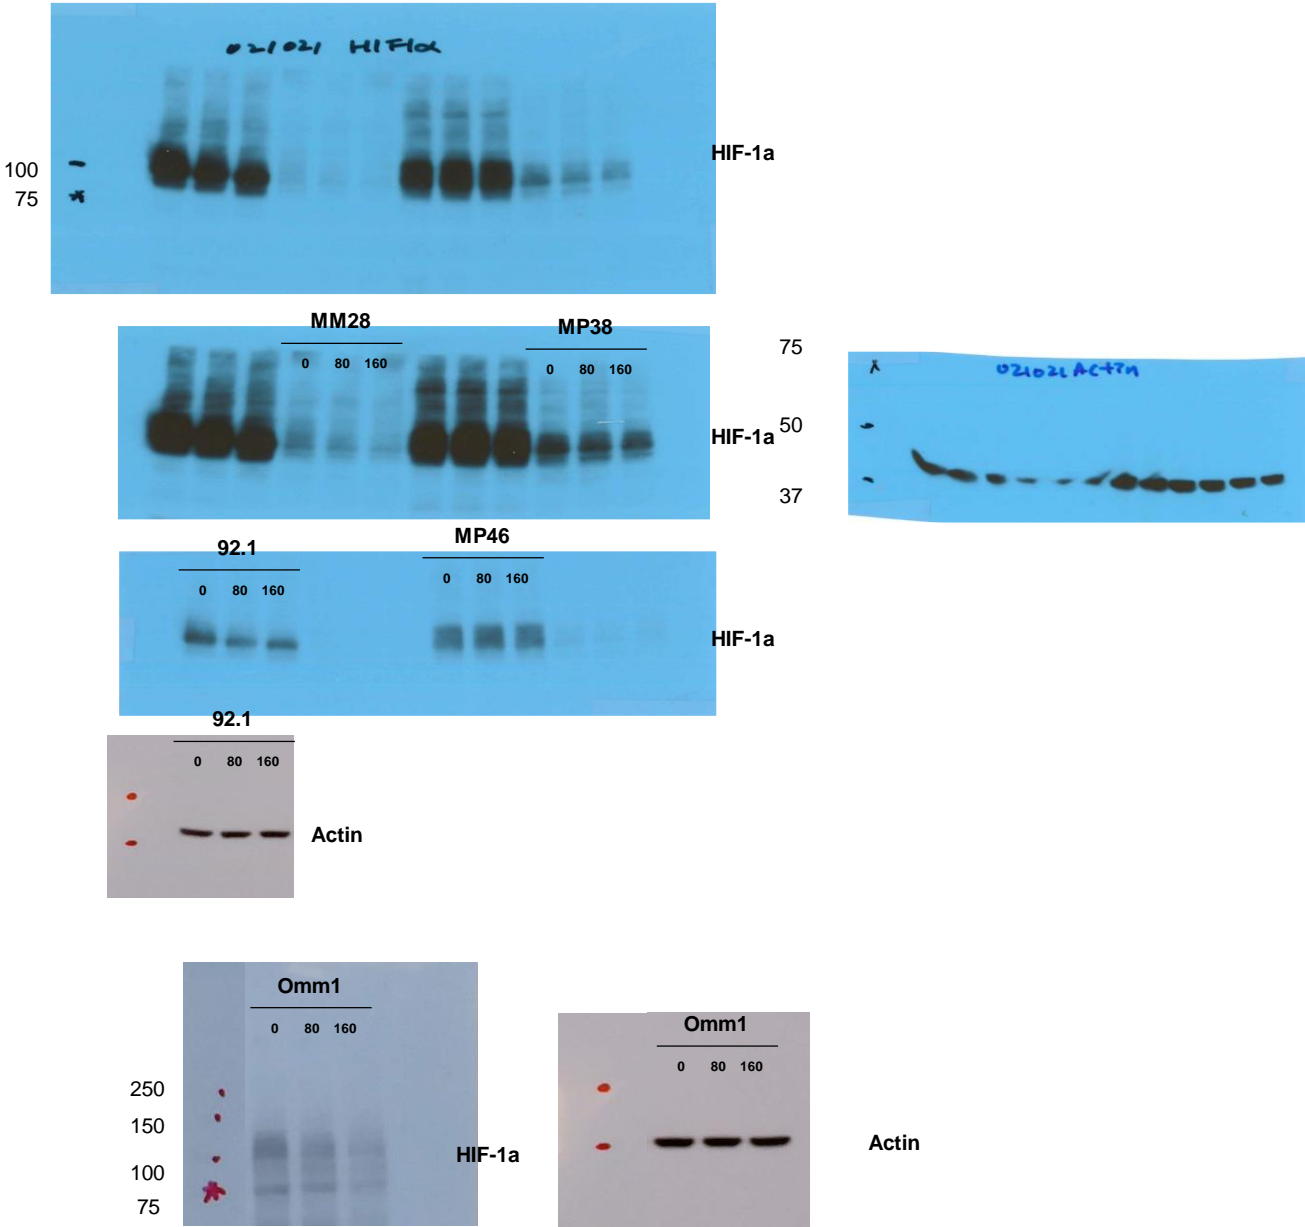

Figure 5.

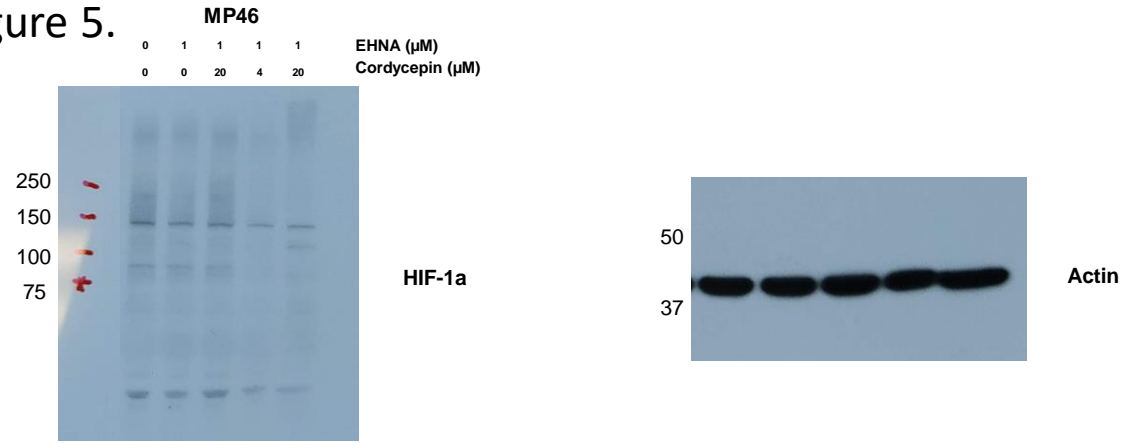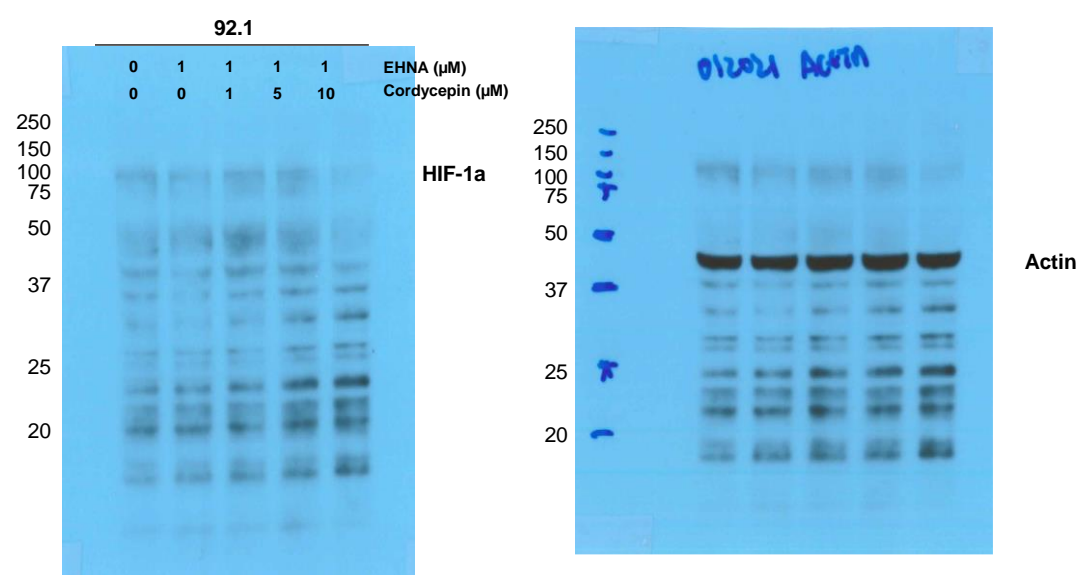

Figure 5.

Mel202

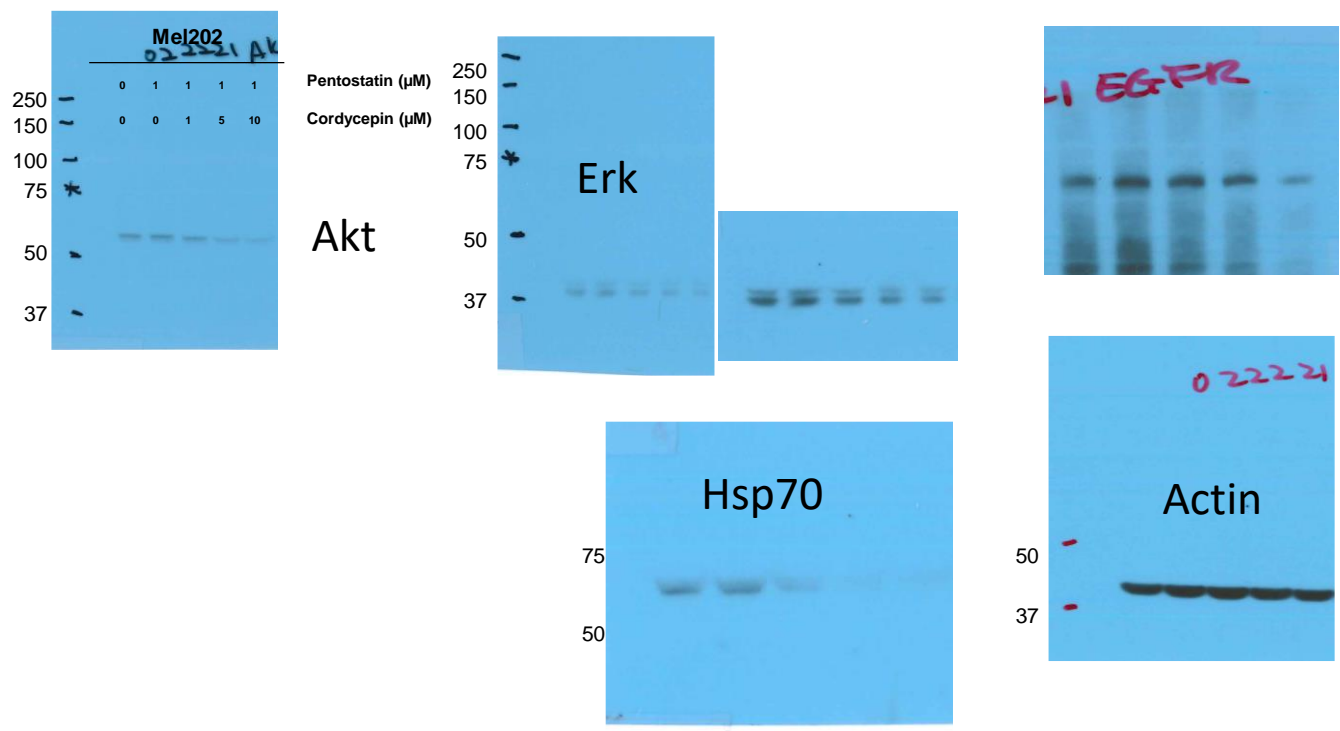

92.1

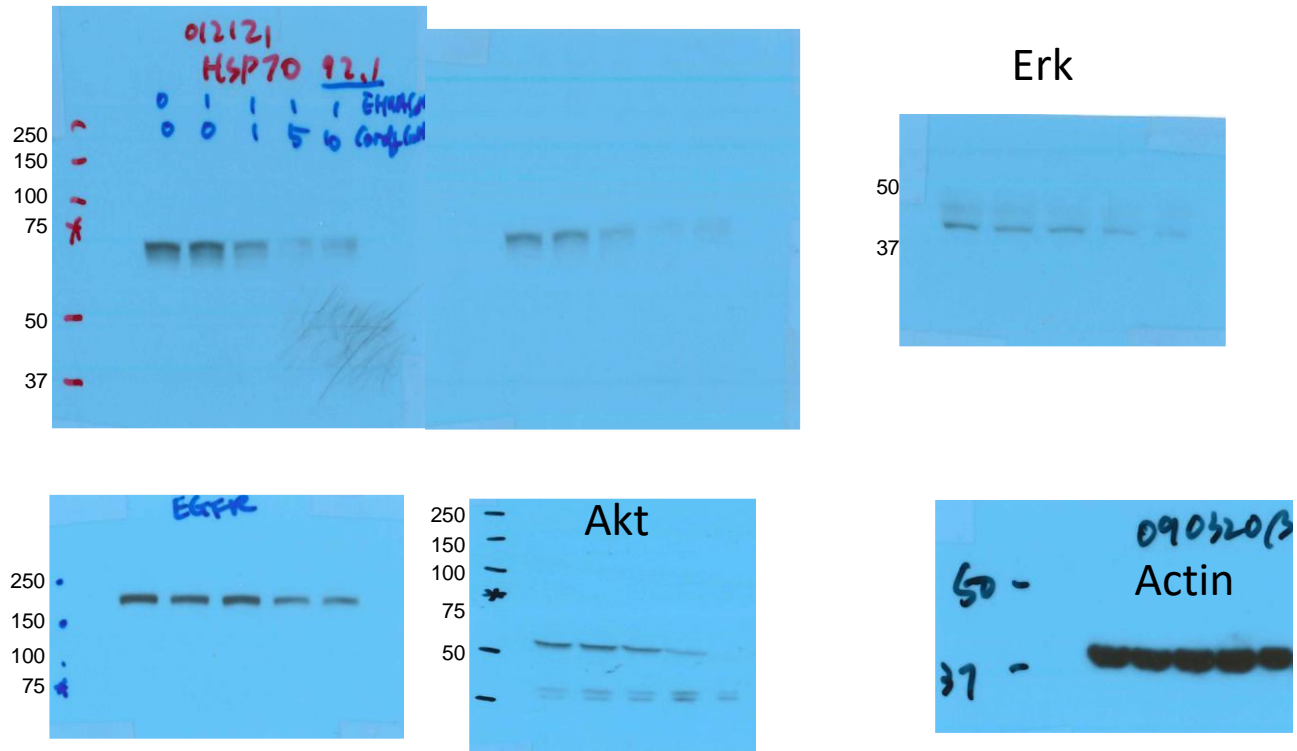



Figure 5.

MP38

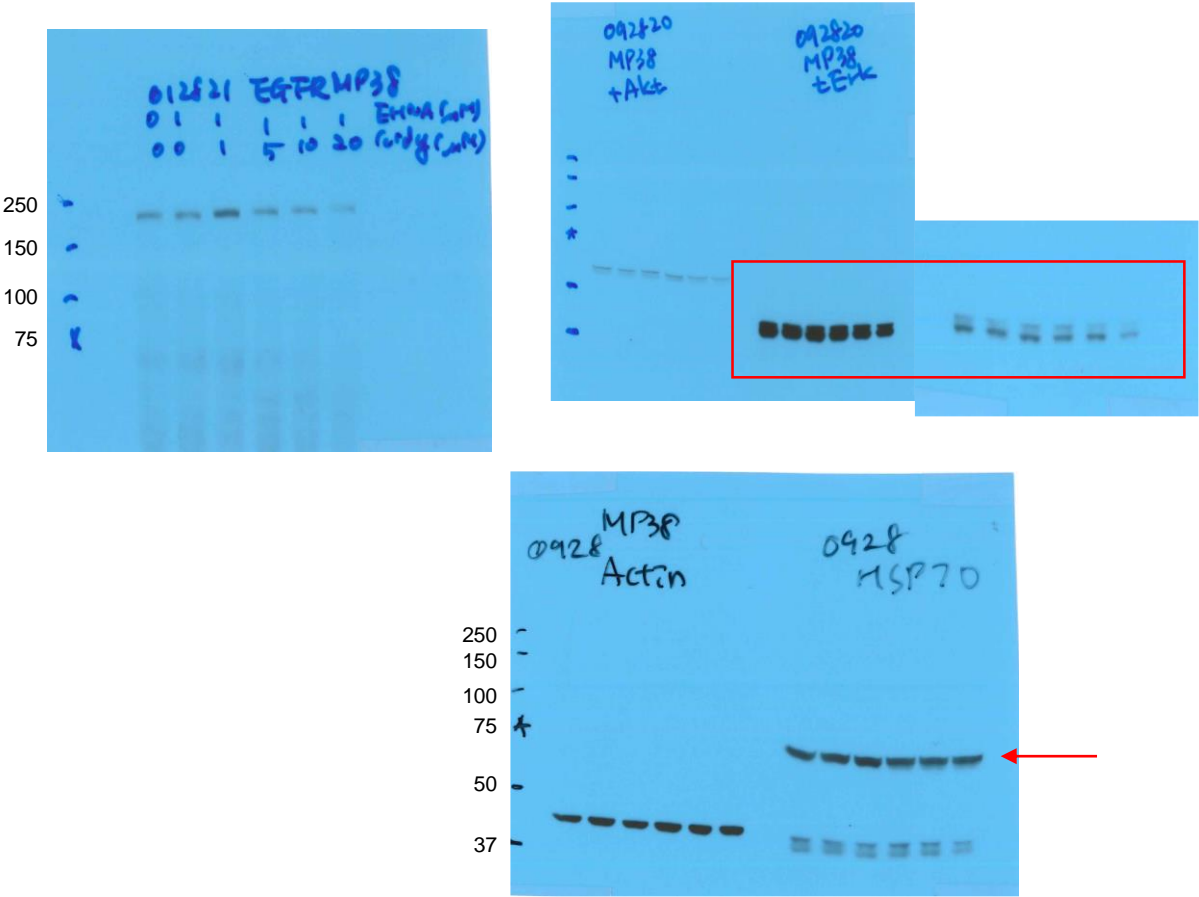

Figure 5.

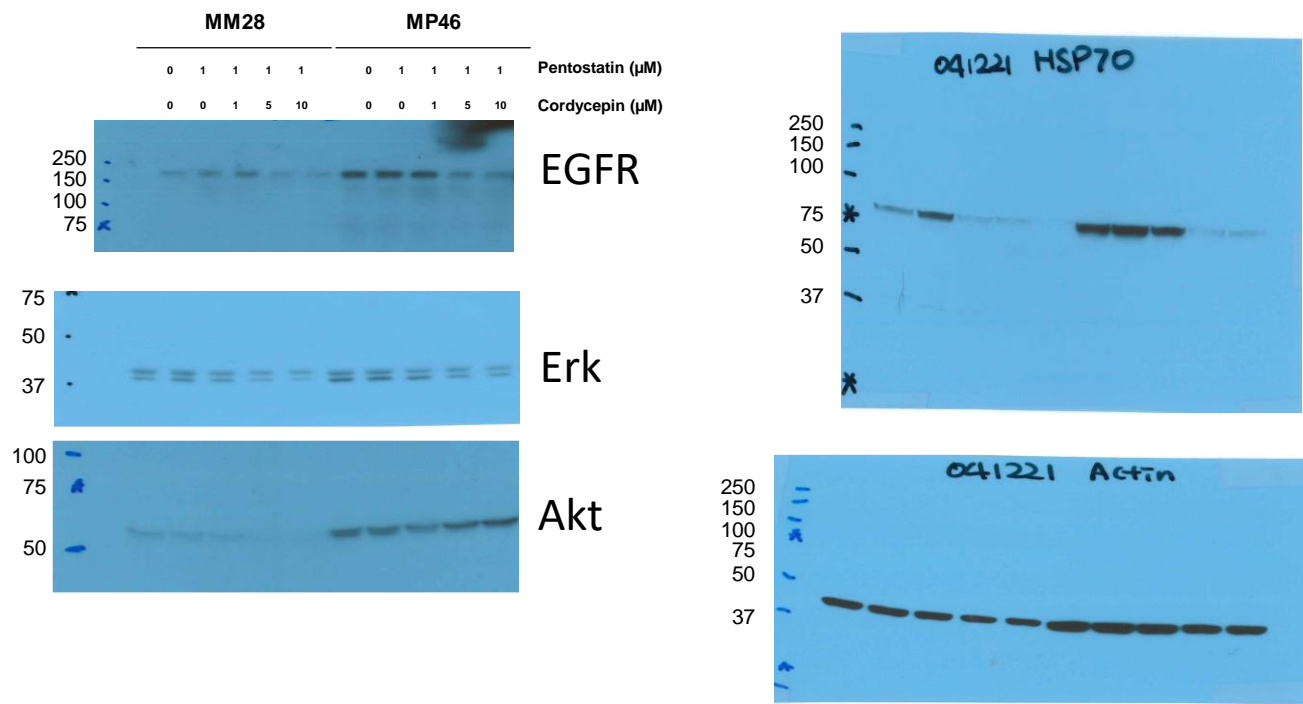

Figure 6.

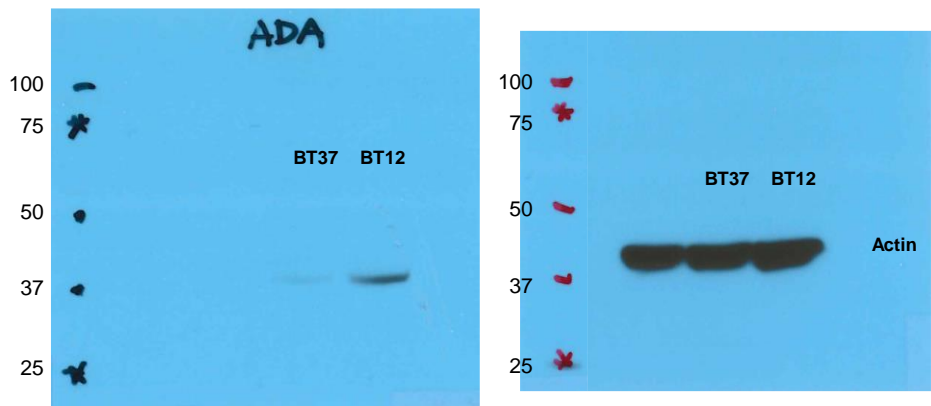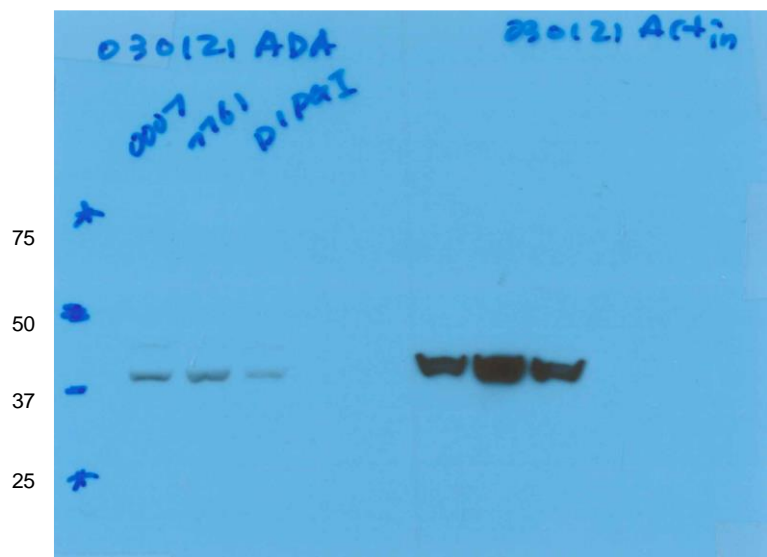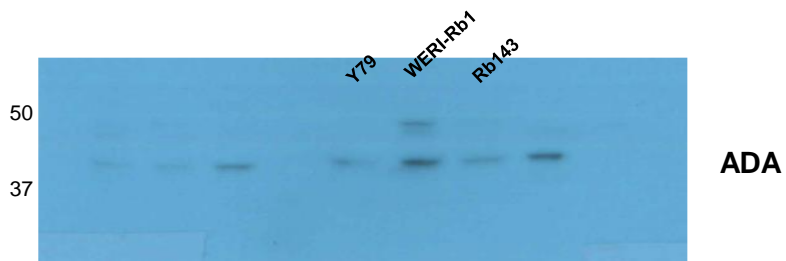

Figure 6.

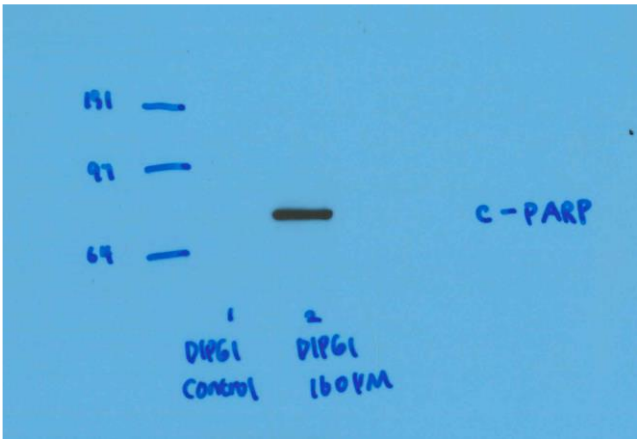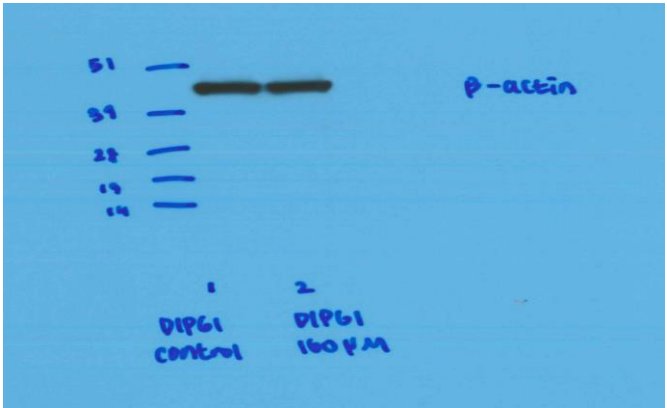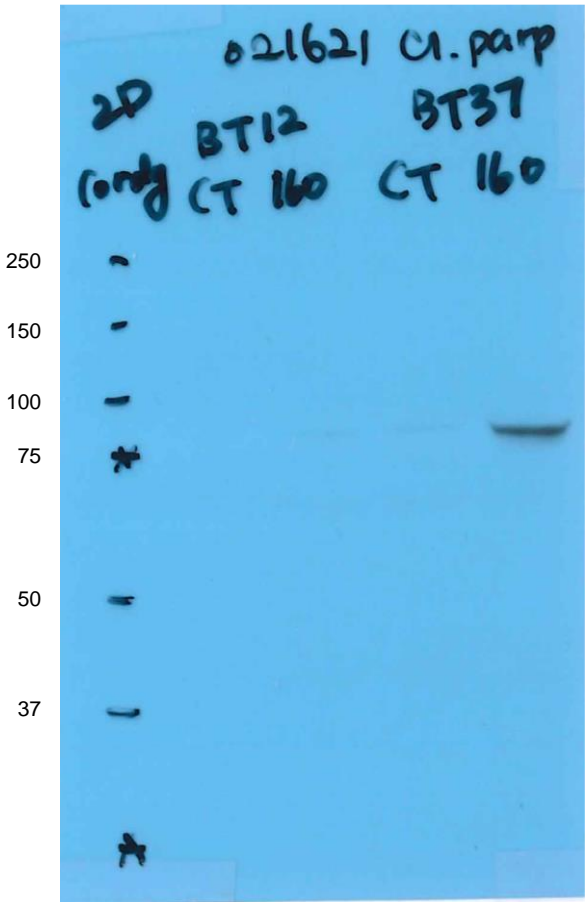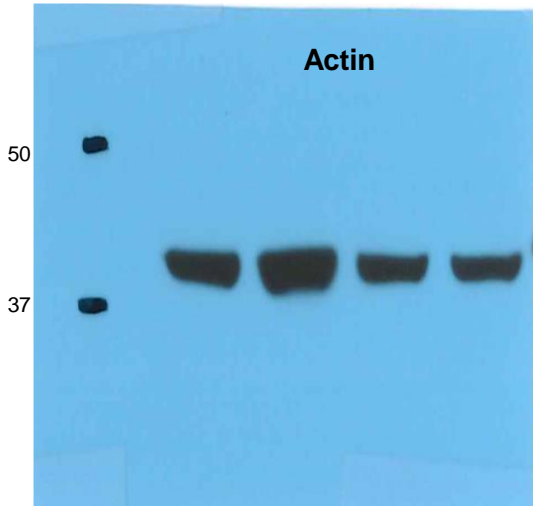

Figure S3

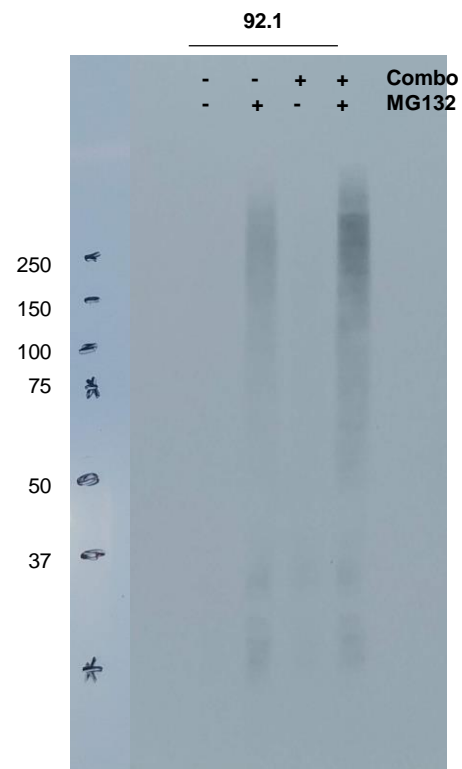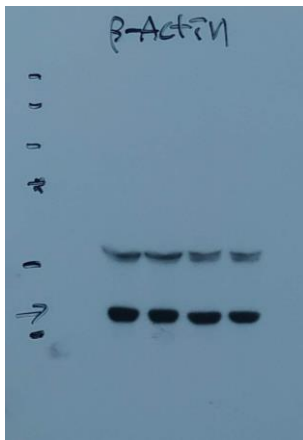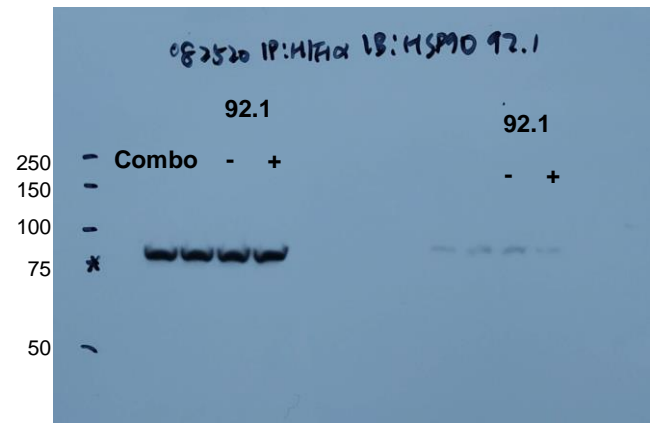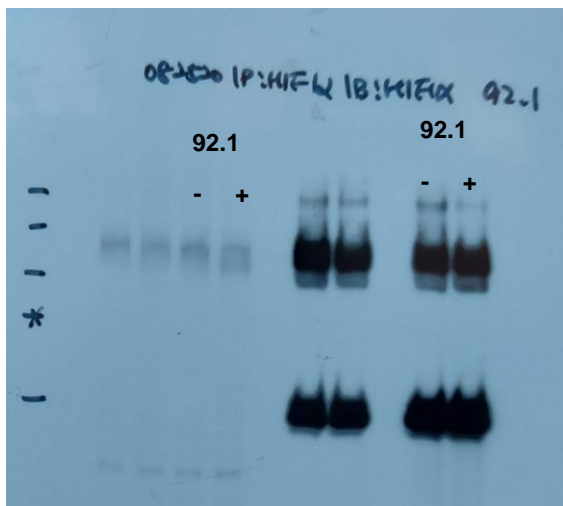

Figure S3

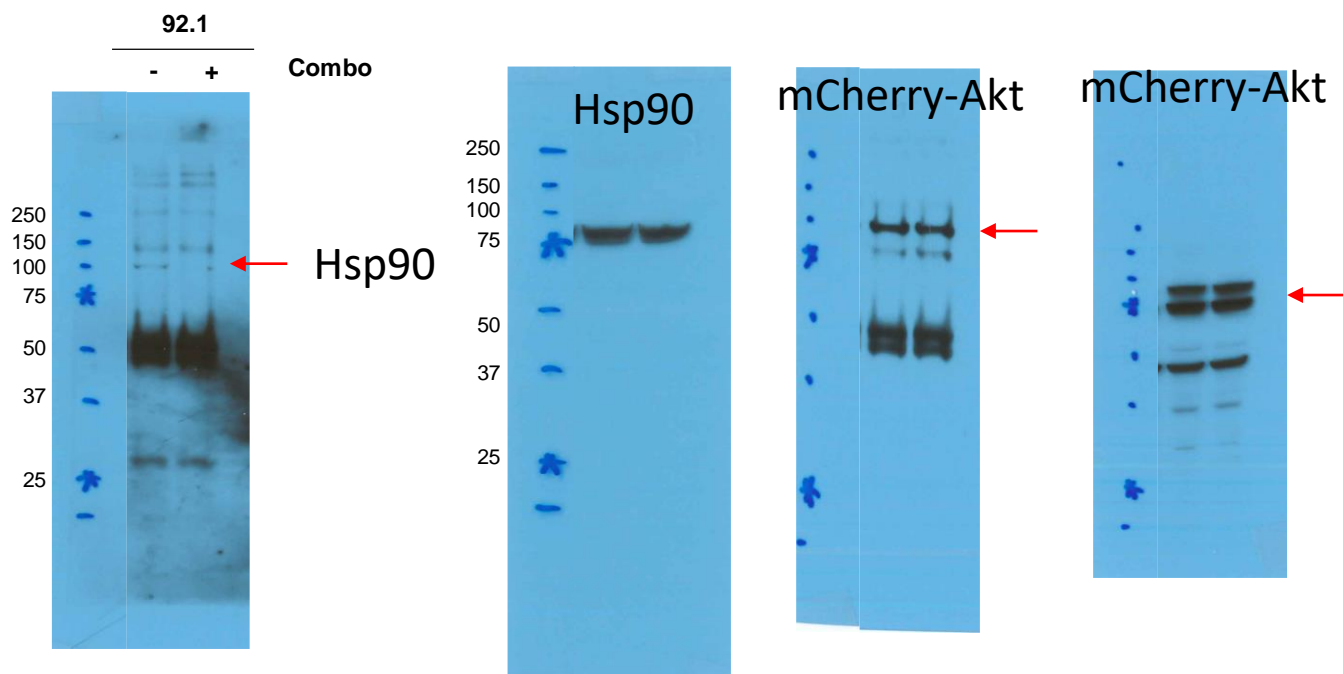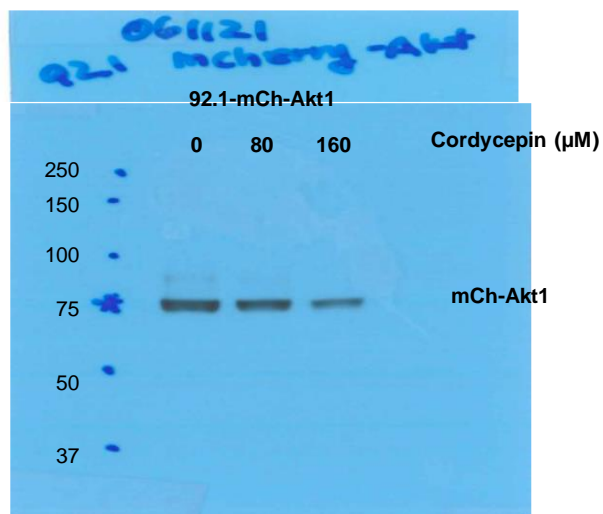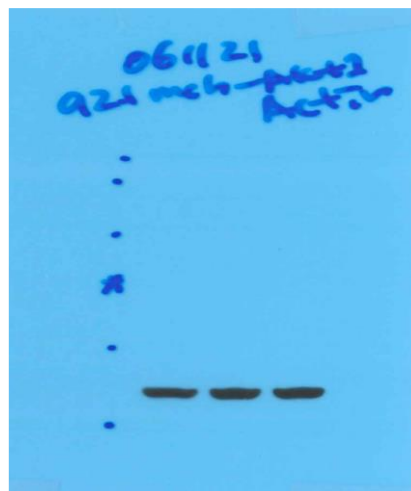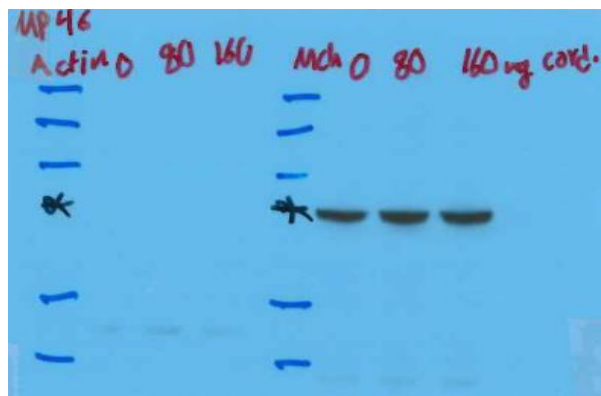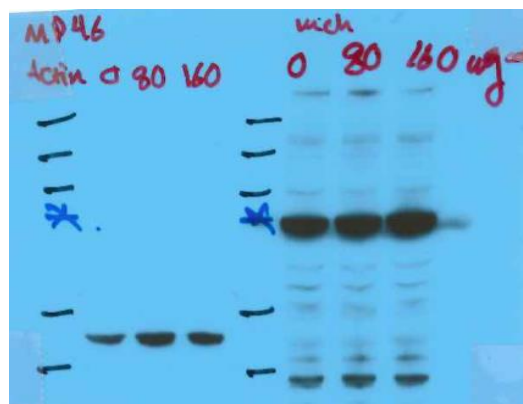

Figure S3

MM28

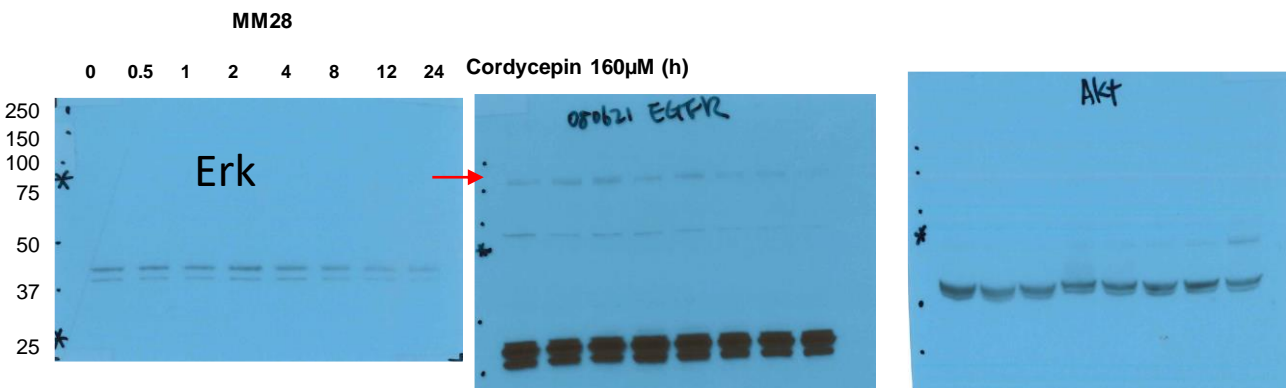

sF3C 92.1 and  
MP46

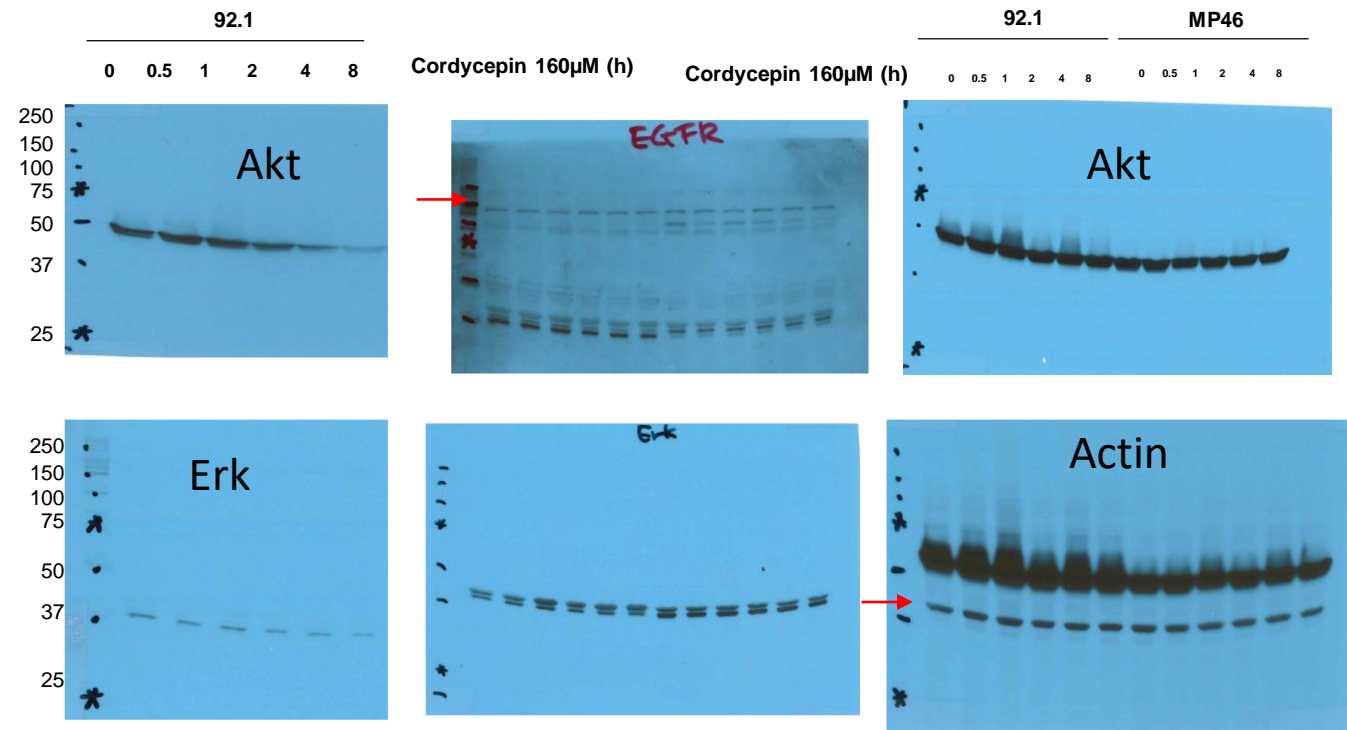



## MP46 xeno VEGF

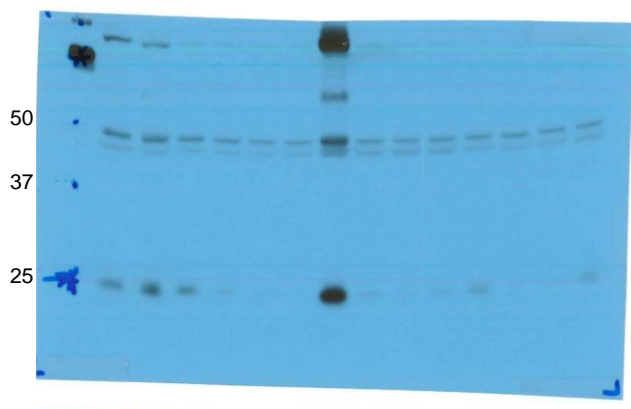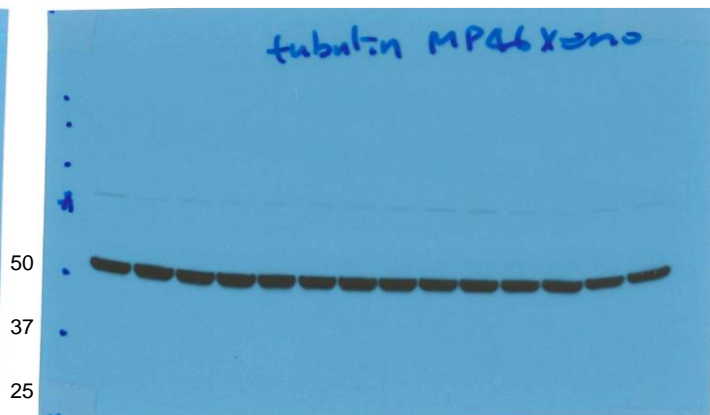

## 92.1 xeno VEGF

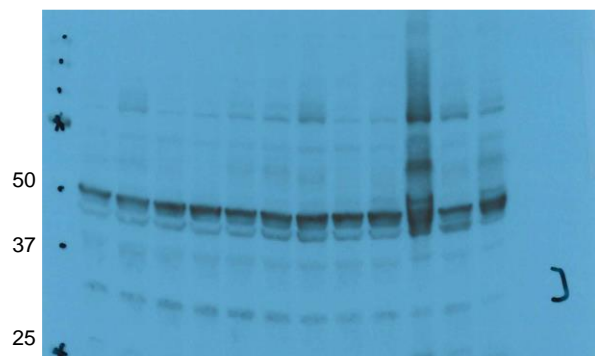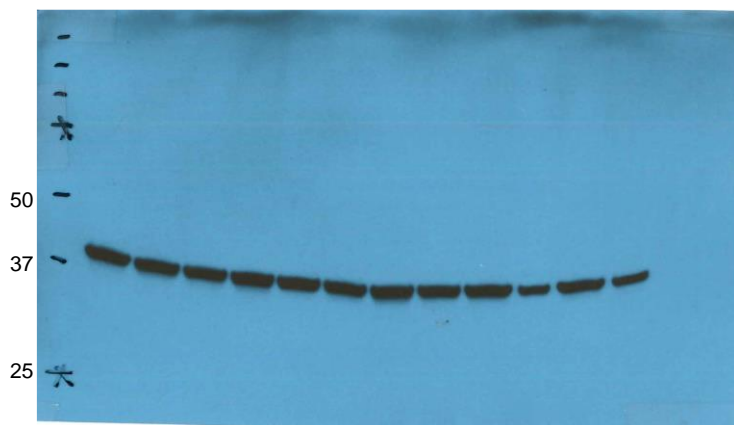

Supplement: s1 [file s1]
